# Supplementary material for: Ketohexokinase-dependent metabolism of cerebral endogenous fructose in microglia drives diabetes-associated cognitive dysfunction
Source: PubMed Central journal article supplement (PMC10689812; doi:10.1038/s12276-023-01112-y), 2023-11-01
Supplement: 12276_2023_1112_MOESM1_ESM.pdf [file 12276_2023_1112_MOESM1_ESM.pdf]

1

## **Text summary**

2

The text content:

3

**Supplementary Material and Methods:** the details of material and methods

4

**Supplementary Table 1:** the list of reagents and software and omics data

5

**Supplementary Figure legends:** Supplementary Figure Legends 1-16

6

## 7 **Supplementary Material and Methods**

### 8 **1. Morris water maze (MWM)**

9 Morris water maze is a thermostatic swimming pool with the temperature of 20-25°C.  
10 Four different shapes (circle, square, diamond and triangle) are pasted on the four  
11 directions around the maze. The hidden platform is 0.5 cm lower than the water  
12 surface in the fourth quadrant. During the 5 training days, mice were gently left into  
13 water from four-marked directions. The escape latency to the hidden platform and  
14 swimming velocity were recorded by WMT-100 Morris system (smart v3.0). On the  
15 last day, the hidden platform was removed and the number of platform crossover were  
16 observed as the criteria to evaluate the learning and memory ability. However, the  
17 swimming speed of db/db mice slowed significantly, and the path efficiency was  
18 calculated by dividing the straight distance between the entry point and the hidden  
19 platform by the total swimming pathway,<sup>1</sup> which balanced the side-effects of slow  
20 swimming velocity in obesity mice and is recommended to evaluate the spatial  
21 memory.

22

### 23 **2. RNA-seq**

24 RNA-seq was performed on 5 biological replicates for db/db, m/m mice and 6  
25 biological replicates for BV2 cell, BV2 cell + fructose and BV2 cell + fructose  
26 +*Khk*-siRNA group. Collected hippocampus and cells were flash frozen in liquid  
27 nitrogen and stored at -80 °C. Total RNA was isolated and purified with Trizol  
28 reagent (Invitrogen, Carlsbad, CA, USA). The total RNA quantity and purity were  
29 analyzed by Bioanalyzer 2100 and RNA 1000 Nano LabChip Kit (Agilent, CA, USA)  
30 with RIN number >7.0. Library preparation was carried out with Illumina TruSeq  
31 Stranded Total RNA Library Prep Gold kit. At last, the paired-end sequencing

32 (PE150), was performed on Illumina Novaseq™ 6000 following the protocol  
33 recommended by the vendor.

34 First, cutadapt-1.9<sup>2</sup> was used to remove the reads containing adapter contamination,  
35 low quality bases and undetermined bases, and sequence quality was verified using  
36 FastQC v0.10.1.<sup>3</sup> Then hisat2-2.0.4 was used<sup>4</sup> to map clean reads to the genome of  
37 Homo sapiens (Ensembl v96). Stringtie-1.3.4<sup>5</sup> and ballgown were used to perform  
38 expression level for genes by calculating FPKM.<sup>6</sup> The Fold change of differentially  
39 expressed genes was  $> 1.2$  or  $< 0.83$ ,  $P$  value  $< 0.05$  was statistically significance by  
40 DESeq2 screening  
41 ([www.bioconductor.org/packages/release/bioc/html/DESeq2.html](http://www.bioconductor.org/packages/release/bioc/html/DESeq2.html)).<sup>5</sup>

42

### 43 **3. TMT proteomics**

44 Five separate biological replicates were performed for both db/db and m/m to quantify  
45 protein expression. The proteins were separated on 12.5% SDS-PAGE gel. Protein  
46 bands were visualized by Coomassie Blue R-250 staining. 100 µg peptide mixture per  
47 sample was labeled using TMT reagent according to the manufacturer's instructions  
48 (Thermo Fisher Scientific). TMT labeled peptides were fractionated by RP  
49 chromatography using the Agilent 1260 infinity II HPLC. The peptide mixture was  
50 diluted with buffer A (10mM HCOONH<sub>4</sub>, 5% ACN, pH 10.0) and loaded onto a  
51 XBridge Peptide BEH C18 Column, 130Å, 5 µm, 4.6 mm X 100 mm column. The  
52 peptides were eluted at a flow rate of 1 ml/min with a gradient of 0%-7% buffer B  
53 (10mM HCOONH<sub>4</sub>, 85% ACN, pH 10.0) for 5 min, 7-40% buffer B during 5-40 min,  
54 40%–100% buffer B during 45-50 min, 100% buffer B during 50-65 min. The peptide  
55 mixture was loaded onto the C18-reversed phase analytical column (Thermo Fisher  
56 Scientific, Acclaim PepMap RSLC 50um X 15cm, nano viper, P/N164943) in buffer

57 A (0.1% Formic acid) and separated with a linear gradient of buffer B (80%  
58 acetonitrile and 0.1% Formic acid) at a flow rate of 300 nl/min. LC-MS/MS analysis  
59 was performed on a Q Exactive Plus mass spectrometer (Thermo Fisher Scientific)  
60 coupled to Easy nLC (Thermo Fisher Scientific) for 90 min. MS data was acquired  
61 with a data-dependent top10 method dynamically choosing the most abundant  
62 precursor ions for HCD fragmentation from the survey scan (350–1800 m/z). MS2  
63 scans were acquired at a resolution of 17500 for HCD spectra at m/z 200 with an  
64 AGC target of  $2e^5$  and a maxIT of 45 ms, and isolation width was 2 m/z. MS/MS raw  
65 files were processed using MASCOT engine (Matrix Science, London, UK; version  
66 2.6) embedded into Proteome Discoverer 2.2, and searched against the  
67 Uniprot\_MusMusculus\_17027\_20200226, downloaded on <http://www.uniprot.org>.  
68 Search parameters included trypsin, as trypsin is the enzyme used to generate peptides  
69 that allow up to 2 missed cleavages. Except for TMT labels, carbamidomethyl (C)  
70 was set as a fixed modification. Variable modifications were Oxidation(M) and Acetyl  
71 (Protein N-term). Proteins with fold change  $> 1.2$  or  $< 0.83$  and *P* value (Student's *t*  
72 test)  $< 0.05$  were considered to be differentially expressed proteins.

73

#### 74 **4. Widely targeted metabolomics**

##### 75 **4.1 Sample preparation and extraction**

76 Six separate biological replicates were performed for both db/db and m/m. Metabolite  
77 extracts were prepared by adding 3 volumes of ice-cold methanol to 1 volume of  
78 plasma/serum, taking 50 mg of one tissue sample and homogenizing it with 1000  $\mu$ l  
79 of ice-cold methanol/water (70%, v/v).

##### 80 **4.2 HPLC conditions**

81 The sample extracts were analyzed using an LC-ESI-MS/MS system (UPLC,

82 Shim-pack UFLC SHIMADZU CBM A system, <https://www.shimadzu.com/>; MS,  
83 QTRAP® System, <https://sciex.com/>).

#### 84 **4.3 ESI-Q TRAP-MS/MS**

85 LIT and triple quadrupole (QQQ) scans were acquired on a triple quadrupole-linear  
86 ion trap mass spectrometer (QTRAP), QTRAP® LC-MS/MS System, equipped with  
87 an ESI Turbo Ion-Spray interface, operating in positive and negative ion mode,  
88 controlled by Analyst 1.6.3 software (Sciex). Subsequent analyses were performed  
89 using MetaboAnalyst 5.0<sup>7</sup> (<https://www.metaboanalyst.ca/home.xhtml>). Differentially  
90 expressed metabolites were identified by fold change > 1.2 or < 0.83, VIP > 1, and *P*  
91 value (Student's *t* test) < 0.05.

92

### 93 **5. Bioinformatics and statistics for OMICs data**

#### 94 **5.1 Comprehensive transcriptomics and metabolomics data analysis**

95 The comprehensive analysis of transcriptomics and metabolomics datasets and  
96 enrichment analysis of metabolomics data were performed using the “joint pathway  
97 analysis” function of MetaboAnalyst 5.0 (<https://www.metaboanalyst.ca/home.xhtml>)  
98 as previously described.<sup>8</sup> Integrated metabolic pathways include pathways containing  
99 both metabolites and metabolic genes. The hypergeometric test was used for the  
100 enrichment analysis, as the topology was measured with “degree centrality”.

101

#### 102 **5.2 Gene/Protein set enrichment analysis**

103 We performed gene set enrichment analysis using software GSEA (v4.1.0) and  
104 MSigDB to identify whether a set of genes in specific GO terms and KEGG pathways  
105 shows significant differences in two groups. Briefly, we input gene expression matrix  
106 and rank genes by Signal2Noise normalization method. Enrichment scores and *P*

107 value was calculated in default parameters. GO terms and KEGG pathways meeting  
108 this condition with  $|\text{NES}| > 1$ , NOM  $P\text{-val} < 0.05$ , FDR  $q\text{-val} < 0.25$  were considered to  
109 be different in two groups.

110

### 111 **5.3 Correlation analysis of DEGs or DEGs and different metabolomics**

112 Pearson's correlation analysis was performed using the OmicStudio tools at  
113 <https://www.omicstudio.cn/tool>,  $P < 0.05$  was considered to be significantly  
114 correlated. A clustering correlation heatmap containing all *Khk* related genes was  
115 designed with OmicStudio tools (<https://www.omicstudio.cn/tool>). Correlation  
116 Network was performed using OmicStudio tools at <https://www.omicstudio.cn/tool>  
117 for all *Khk* related genes with  $|\text{correlation coefficients}| > 0.8$ .

118

### 119 **5.4 Functional enrichment analysis**

120 Enrichment analysis of Gene Ontology (GO) and Kyoto Encyclopedia of Genes and  
121 Genomes (KEGG) was performed with R package clusterProfiler at  
122 <https://www.omicstudio.cn/tool>. The GO system mainly revealed the biological  
123 processes (BP), cellular components (CC), and molecular functions (MF) involved in  
124 target genes. The focus of KEGG analysis is to explore the potential pathways in  
125 which the target genes might be involved. Enriched GO terms and KEGG pathways  
126 were determined according to the  $P < 0.05$ .

127

### 128 **5.5 Volcano plot and venn diagram**

129 The volcano plot and venn diagrams were performed at  
130 <https://www.omicstudio.cn/tool>.

131

## 132 **5.6 Single cell RNA-Seq data acquisition and analysis**

133 Using R package Seurat (4.3.0) from GEO database  
134 (<http://www.ncbi.nlm.nih.gov/geo>) in the calculation and analysis data set  
135 GSE201644<sup>9 10</sup>. In order to perform initial quality control on the extracted gene cell  
136 matrix, we screened cells with parameters of  $200 \leq \text{number of feature RNA} \leq 5,000$   
137 and mitochondrial genes  $\leq 2.0\%$ . The "NormalizeData" and "ScaleData" functions  
138 were used to normalize and scale the gene expression matrix to obtain a linear  
139 transformation of the remaining high-quality cells. For PCA, the first 2000 variable  
140 genes were selected and the 20 most important principal components were used for  
141 cluster analysis. Subsequently, the batch effect was eliminated by combining  
142 single-cell data from multiple samples using the Harmony package's "Runharmony"  
143 feature<sup>11</sup>. Display clusters using uniform manifold approximation and projection  
144 (UMAP). Annotate cell types based on the expression of known markers, Such as  
145 Astrocyte (Gfap, Aqp4, Mfge8, Aldh111 and Aldoc), Microglia (P2ry12, Tmem119,  
146 Tnf, Gpr84, Aif1 and Hexb) and Oligodendrocyte (Fa2h, Olig1, Mog and Plp1),  
147 Endothelial (Cldn5, Flt1, Esam, Ly6c1 and Itm2a), VSMC (Rgs5, Vtn Myl9, Col4a1  
148 and Acta2) and Ependymal (Ccnc153, Foxj1, Ttr, Enpp2, Rarres 2 and Ecrg4),  
149 Mo/Mp (Cd68, Dab2 F13a1, Lyve1, Mgl2 and Mrc1) and B cells (Cd19, Cd79a,  
150 Ms4a1 and Vpreb3), T cell (Cd3d, Cd3e and Cd3g), Neuron (Meg3, Tubb3, Stmn2,  
151 Map2 and Rbfox3), Neutrophil (Retnlg, S100a8 and S100a9), Neural stem cell (Pclaf,  
152 Sox11, Hmgb2 and Top2a) and Erythrocyte (Hbb-bt, Hba-a1 and Hba-a2).

153

## 154 **6. Virus vectors and infections**

155 Recombinant adeno-associated virus (rAAV2/6m) expressing U6-driven shRNA and  
156 CMV-driven EGFP (rAAV-U6-shRNA-CMV-EGFP-pA) was used. The scrambled

157 shRNA sequence was CCTAAGGTAAAGTCGCCCTCG, which was not targeted in  
158 both human and mouse. The KHK shRNA sequence was  
159 GCAGCGGATAGAGGAGCACAA, which was targeted mouse *Khk* (GenBank:  
160 NM\_001310524.1). All AAVs were from BrainVTA Wuhan China.

161 At Week 20, 4 weeks prior to MWM test, mice were injected AAV. They were  
162 anaesthetized with isoflurane, and placed on stereotaxic apparatus with lidocaine  
163 subcutaneously injected for pain relief. Erythromycin eye ointment was used to  
164 prevent conjunctival infection. AAV (500 nl) was infused into the bilateral  
165 hippocampus of the brain (AP = 1.5mm posterior to bregma, ML = 1.0mm lateral to  
166 bregma, DV = 1.55mm below the skull surface) using a 5 $\mu$ l syringe and a 33-gauge  
167 metal needle (65460-02, Hamilton, USA), followed by a slow withdrawal over 10 min  
168 to prevent back flow. After injection, water intake and body weight of each mouse  
169 were monitored every 2 days, where the water intake was calculated from the volum  
170 difference of water remaining in the cage.

171

## 172 **7. Western blotting**

173 Protein concentrations were extracted from hippocampus and cells using ice-cold  
174 RIPA buffer (Beyotime, Nantong, China) containing protease inhibitor and  
175 phosphatase inhibitor (Thermo Fisher Scientific, Waltham, MA, USA). Then, the  
176 homogenate sample was centrifuged at 12000 r/min for 15 mins at 4°C, and the  
177 supernatant was collected and measured using a BCA protein assay kit (Beyotime,  
178 Nantong, China). Protein samples were dissolved in loading buffer and denatured at  
179 99 °C for 10 mins. A 20-30  $\mu$ g protein was subjected to 10%-15% SDS  
180 polyacrylamide gel electrophoresis and transferred onto polyvinylidene difluoride  
181 membranes (PVDF, Millipore, Bedford, MA, USA). The remaining protein samples



182 were stored at -80°C. The PVDF membranes were blocked in 5% skim milk for 1h  
183 and then incubated overnight at 4°C with corresponding primary antibodies. Then  
184 PVDF membranes were washed with TBST membrane and incubated with  
185 appropriate secondary antibodies for 2 hrs. Specific bands of target proteins were  
186 visualized using the chemiluminescence reagents provided by ECL kit (Affinity,  
187 Shanghai, CN). The band densities were determined using Image J software (NIH,  
188 Maryland, USA) and normalized to each internal control. The list of antibodies  
189 involved in the western blot is shown in Supplementary Table 1.

190

## 191 **8. Immunofluorescence staining and analysis**

192 After gradient dehydration with 20% glucose and 30% glucose, mouse brain were  
193 embedded with OCT glue and frozen in a cryostat (Cryostar NX50™, Thermo  
194 Scientific) for more than 1h. The frozen brain samples were prepared into 15- $\mu$ m  
195 thick sections. BV2 cells or primary microglia were seeded in 24-well plates with cell  
196 climbing slices for immunofluorescence. The tissues and cells were fixed in 4%  
197 paraformaldehyde and washed with PBS and then incubated with goat serum  
198 containing 0.2% Trion-100 for 30min at 37°C. They were incubated with primary  
199 antibodies at the 4°C overnight and then washed with PBS (phosphate-buffered saline)  
200 for 5 min  $\times$  3 times. Fluorescent secondary antibodies were added at room  
201 temperature for 2h. Finally, DAPI (D9564, sigma, Saint Louis, USA) was added for  
202 5min. The images were captured as soon as possible by a confocal microscope (Leica  
203 TCS SP8 STED 3X, Wetzlar, Germany). Specifically, images of spine puncta were  
204 captured by a Leica TCS SP8 DLS microscopy (Wetzlar, Germany). Imaris software  
205 (v.9.7, Bitplane, Zurich, Switzerland) was used to reconstruct and analyze  
206 immunofluorescent colocalization and microglia morphology. The antibody used for

207 immunofluorescence staining are listed in Supplementary Table 1.

208

## 209 **9. Golgi staining and analysis**

210 Golgi staining was performed as previously described with minor modifications.<sup>12</sup>

211 Briefly, the brain tissue was removed and immersed in Golgi-Cox solution (consisting

212 of 5% potassium chromate, 5% potassium dichromate, and 5% mercuric chloride) for

213 further fixation, after which the tissue was maintained in the dark at room temperature

214 for 2-3 days. The brains were then transferred to fresh Golgi-Cox Solution for an

215 additional 7 days and serially sliced into 150 µm sections. The sections were washed

216 twice in deionized water for 5 min, placed in 50% NH<sub>4</sub>OH for 5 min, and washed

217 again in deionized water for 5 min twice. After that, the sections were incubated in

218 5% sodium thiosulfate for 10 min, rinsed in PBS and then dehydrated in graded

219 ethanol solution. The sections were observed under the bright field of a confocal

220 microscope (Leica TCS SP8 STED 3X, Wetzlar, Germany). At an excitation

221 wavelength of 405 nm, images were taken by z-stack scanning and the virtual color

222 was converted into green. Imaris software (v.9.7, Bitplane, Zurich, Switzerland) were

223 used to reconstruct and analyze neuronal dendritic arbors and dendritic spines.

224

## 225 **10. Brain slice patch-clamp recording (Brain slice preparation)**

226 Slice preparation was performed as described previously<sup>12</sup>. Briefly, 3 weeks after the

227 bilateral hippocampal injection of AAV virus, mice were anesthetized with isoflurane

228 and transcardially perfused with ice-cold oxygenated (95% O<sub>2</sub>, 5% CO<sub>2</sub>) cutting

229 solution (95 mM NaCl, 1.8 mM KCl, 1.2 mM KH<sub>2</sub>PO<sub>4</sub>, 0.5 mM CaCl<sub>2</sub>, 7 mM MgSO<sub>4</sub>,

230 26 mM NaHCO<sub>3</sub>, 15 mM glucose, 50 mM sucrose, pH 7.4). The mice were rapidly

231 decapitated and their brains were removed quickly and placed in the cutting solution.

232 Hippocampal slices of 300  $\mu$ m thickness were prepared with VT1200S Vibratome  
233 (Leica, Wetzlar, Germany), stored in an recording solution at  $32 \pm 1^\circ\text{C}$  for 30 min, and  
234 then left at room temperature for one hour for recording. Standard whole-cell patch  
235 clamp recordings were performed in hippocampal CA1 pyramidal neurons in the  
236 same recording solution as the cutting solution, with the following exceptions: 127  
237 mM NaCl, 2.4 mM  $\text{CaCl}_2$ , 1.3 mM  $\text{MgSO}_4$ , and 0 mM sucrose. The pipette solution  
238 for electrophysiological recording contained 125 mM K-gluconate, 5 mM KCl, 10  
239 mM HEPES, 0.2 mM EGTA, 1 mM  $\text{MgCl}_2$ , 4 mM Mg-ATP, 0.3 mM Na-GTP and 10  
240 mM phosphocreatine (pH 7.35, 290 mOsm). Data were acquired using the  
241 MultiClamp 700B amplifier (Molecular Devices, USA) and the 1550A digitizer  
242 (Molecular Devices, USA). Series resistance was monitored throughout the  
243 experiments and the cell resistance included in analysis was  $< 20 \text{ M}\Omega$ . Neurons would  
244 be rejected if membrane potentials were more positive than -60 mV, the  $R_{in}$  to  $R_s$   
245 ratio  $< 5$  or if series resistance fluctuated  $> 20\%$  of initial values. Data were filtered at  
246 3 kHz and sampled at 10 kHz.

247

## 248 **11. Isolation, culture and treatment of primary microglia.**

249 Primary mice microglia were isolated from cerebral cortices of P1 to P3 *Khk* KO or  
250 wide type mice as previously described<sup>13</sup>. After seeding into poly-l-lysine-coated  
251 glass coverslips, the microglia were cultured with DMEM (Gibco, Carlsbad, USA)  
252 containing 10% FBS (Sigma, California, USA) and 1% penicillin-streptomycin  
253 solution (PS, Gibco, Carlsbad, USA). The medium was exchanged every 3 days. After  
254 about 6-7 days, microglia were treated with or without 0.25mM fructose for western  
255 blotting, Immunofluorescence staining and ROS examine. To obtain the condition  
256 medium, after 24 h of fructose stimulation with or without inhibitors (GKT137831,

257 Mito-Tempo and N-acetylcysteine), all medium were changed to a fresh neurobasal  
258 for another 24 h. The conditioned neurobasal medium was obtained and centrifuged at  
259 1500 rpm for 10 min. The supernatant was collected, stored at -20 °C, and treated  
260 primary neurons according to the experiment.

261

## 262 **12. BV2 Cell Culture and treatment.**

263 BV2 microglial cell line was maintained in high glucose DMEM containing 10% (v/v)  
264 FBS (Gemini, Cleveland, USA) and 1% PS (Gibco, Carlsbad, USA) at 37°C in a  
265 humidified environment of 95% air and 5% CO<sub>2</sub>, with medium changing every 2 days.  
266 Cells were cultured to 75% confluence in 6-well plates for 24 h experiments involving  
267 insult with fructose (MCE, Monmouth Junction, USA) or osthole (Santa cruz, Santa  
268 cruz, USA) at different concentration.

269 *Khk*-siRNA, negative control siRNA (NC-siRNA) and siRNA-Mate Transfection  
270 Reagent for siRNA transfection were purchased from GenePharma Co., Ltd.  
271 (Shanghai, China). The sequences for mouse *Khk* siRNAs are designed as follows: 5'-  
272 GGUGGUGUUUGUCAGCAAATT-3', 5'- CCCGUACCAUUAUACUCUATT-3', 5'-  
273 AGCGGAUAGAGGAGCACAATT-3'. The negative control siRNA contains a  
274 scrambled sequence that will not result in degradation of cellular mRNA. BV2 cells  
275 were transfected with siRNA-siRNA-Mate complex for 6 h according to the  
276 manufacturer's protocols. After 48-72 h, they were treated with fructose.

277

## 278 **13. Isolation, culture and treatment of primary neuron.**

279 Primary cultures of hippocampal neurons were isolated from prenatal mice as  
280 previous described<sup>14</sup>. Neurons were cultured in Neurobasal (Thermo Fisher Scientific,  
281 Waltham, MA, USA) with 2% B27 (Thermo Fisher Scientific, Waltham, MA, USA),

282 2mM L-glutamine (Gibco, Carlsbad, USA) and 1% PS for 7-9 days. After treated with  
283 conditioned neurobasal medium (supplemented with 2% B27, 2mM L-glutamine and  
284 1% PS) for 24 h, protein was extracted for western blotting.

285

#### 286 **14. HT22 cell culture and treatment**

287 Immortalized mouse HT22 hippocampal neurons (Beina Chuanglian Biotech Institute,  
288 Beijing, China) were cultured in DMEM supplemented with 10% FBS, 1% PS at  
289 37 °C in 5% CO<sub>2</sub>. The DMEM was changed every 1-2 days. Protein was extracted  
290 under different BV2 cell condition medium treating for 24 h.

291

**Supplementary Table 1. List of reagents, software and data**

| <b>Antibodies</b>                         | <b>Source</b>               | <b>Identifier</b> | <b>Use</b>             |
|-------------------------------------------|-----------------------------|-------------------|------------------------|
| Mouse monoclonal<br>anti-Aldose Reductase | Santa Cruz<br>Biotechnology | sc-166918         | WB: 1:400              |
| Mouse monoclonal<br>anti-Glut5            | Santa Cruz<br>Biotechnology | sc-271055         | WB: 1:50<br>IF: 1:50   |
| Mouse monoclonal<br>anti-Ketohexokinase   | Santa Cruz<br>Biotechnology | sc-377411         | WB: 1:50<br>IF: 1:25   |
| Chicken polyclonal<br>anti-GFAP           | Genetex                     | GTX85454          | IF: 1: 300             |
| Mouse monoclonal<br>anti-Iba1             | Santa Cruz                  | sc-32725          | IF: 1: 25              |
| Rabbit polyclonal<br>anti-Iba1            | Wako                        | 019-19741         | IF: 1: 500             |
| Rabbit monoclonal<br>Anti-NeuN            | Abcam                       | ab177487          | IF: 1: 100             |
| Mouse monoclonal<br>anti-Gp91-phox        | Santa Cruz<br>Biotechnology | sc-130543         | WB:1: 500              |
| Mouse monoclonal<br>anti-P22-phox         | Santa Cruz<br>Biotechnology | sc-271968         | WB:1: 100              |
| Rabbit Polyclonal<br>anti-NOX4            | Proteintech                 | 14347-1-AP        | WB: 1:4000<br>IF: 1:25 |
| Mouse Monoclonal<br>anti-NOX4             | Santa Cruz<br>Biotechnology | sc-518092         | IF: 1:25               |
| Rabbit monoclonal                         | Abcam                       | ab238135          | WB: 1:1000             |

|                                                                          |             |            |                         |
|--------------------------------------------------------------------------|-------------|------------|-------------------------|
| Anti-PSD95                                                               |             |            | IF: 1:25                |
| Rabbit monoclonal anti-Synaptophysin                                     | Abcam       | ab32127    | WB: 1:10000             |
| Alexa Fluor 594 anti-synaptophysin [YE269]                               | Abcam       | ab206868   | IF: 1:50                |
| NDUFS8                                                                   | Proteintech | 25172-1-AP | WB: 1:1000              |
| SDHB                                                                     | Genetex     | GTX113833  | WB: 1:1000              |
| CYTB                                                                     | Proteintech | 55090-1-AP | WB: 1:500               |
| Complex IV                                                               | Proteintech | 11242-1-AP | WB: 1:1000<br>IF: 1:300 |
| ATPase IF1                                                               | Abcam       | ab110277   | WB: 1:1000              |
| HRP labeled goat anti-rabbit IgG (H+L)                                   | Diyibio     | DY60202    | WB:1:5000               |
| HRP labeled goat anti-mouse IgG (H+L)                                    | Diyibio     | DY60203    | WB: 1:5000              |
| Donkey Anti-Rabbit IgG H&L (Alexa Fluor® 594)                            | Abcam       | ab150064   | IF: 1:500               |
| Goat polyclonal Secondary Antibody to Mouse IgG - H&L (Alexa Fluor® 647) | Abcam       | ab150115   | IF: 1:500               |
| Donkey polyclonal                                                        | Jackson     | RRID:      | IF: 1:500               |

|                                                                        |                       |                 |                                            |
|------------------------------------------------------------------------|-----------------------|-----------------|--------------------------------------------|
| Anti-Chicken IgY<br>(IgG) (H+L)(Alexa<br>Fluor® 488)                   | immunoresearch<br>lab | AB_2340375      |                                            |
| Donkey anti-Mouse<br>IgG (H+L)(Alexa Fluor<br>594)                     | Invitrogen            | A-21203         | IF: 1:500                                  |
| Donkey polyclonal<br>anti-Rabbit IgG<br>(H+L)(Alexa Fluor Plus<br>488) | Invitrogen            | A32790          | IF: 1:500                                  |
| Donkey polyclonal<br>anti-rabbit IgG<br>(H+L)(Alexa Fluor<br>647)      | Invitrogen            | A31573          | IF: 1:500                                  |
| <b>Chemicals, peptides, and recombinant proteins</b>                   |                       |                 |                                            |
| Osthole                                                                | Santa cruz            | sc-205780       | KHK inhibitor                              |
| Fructose                                                               | MCE                   | <u>HY-N0395</u> | Cell treatment                             |
| TTX                                                                    | MREDA                 | M046335         | voltage-gated<br>sodium channel<br>blocker |
| Picrotoxin                                                             | Tocris                | 13A/141261      | GABA <sub>A</sub> antagonist               |
| GKT137831                                                              | MCE                   | HY-12298        | NOX4 inhibitor                             |
| N-Acetylcysteine                                                       | MCE                   | HY-B0215        | ROS scavenger                              |
| mitoTEMPO                                                              | GLPBIO                | GC44206         | Mitochondrial<br>ROS inhibitor             |



| <b>Commercial assays</b>                                 |                                            |             |                                    |
|----------------------------------------------------------|--------------------------------------------|-------------|------------------------------------|
| Tissue Reactive Oxygen Species (ROS) Detection Assay Kit | Bestbio                                    | BB-470512-1 | Examining ROS level of hippocampus |
| Cell Reactive Oxygen Species (ROS) Detection Assay Kit   | Beyotime                                   | S0033S      | Examining ROS level of BV2         |
| Lipid Peroxidation MDA Assay Kit                         | Beyotime                                   | S0131S      | Examining MDA level                |
| Mouse 8-Hydroxy-desoxyguanosine (8-OHdG) ELISA Kit       | SinoBestBio                                | YX-E27780   | Examining 8-OHdG level             |
| Mouse Nitrotyrosine (NT) ELISA Kit                       | SinoBestBio                                | YX-E23780   | Examining NT level                 |
| Enhanced ATP Assay Kit                                   | Beyotime                                   | S0027       | Examining NT level                 |
| Fructose Assay Kit                                       | Nanjing Jiancheng Bioengineering Institute | A085-1-1    | Examining fructose level           |
| Sorbitol Assay Kit                                       | Solarbio                                   | BC2525      | Examining Sorbitol level           |
| Mouse INS (Insulin) ELISA Kit                            | Xinlebio                                   | XI-Em0483   | Examining Insulin level            |

|                                               |                                                         |                                                                     |                                                             |
|-----------------------------------------------|---------------------------------------------------------|---------------------------------------------------------------------|-------------------------------------------------------------|
| Enhanced ATP Assay Kit                        | Beyotime                                                | S0027                                                               | Examining ATP level                                         |
| <b>Deposited data</b>                         |                                                         |                                                                     |                                                             |
| Serum metabolomics data                       | This paper                                              | CNP0002843                                                          | Bioinformatics analysis                                     |
| Hippocampus metabolomics data                 | This paper                                              | CNP0002843                                                          | Bioinformatics analysis                                     |
| Hippocampus proteomics data                   | This paper                                              | CNP0002843                                                          | Bioinformatics analysis                                     |
| Hippocampus transcriptomics data              | This paper                                              | CNP0002843                                                          | Bioinformatics analysis                                     |
| BV2 cell transcriptomics data                 | This paper                                              | CNP0003300                                                          | Bioinformatics analysis                                     |
| <b>Experimental models: Organisms/strains</b> |                                                         |                                                                     |                                                             |
| db/db mouse                                   | Model Animal Research Center of the Nanjing University. | N/A                                                                 | Type 2 diabetic model                                       |
| <i>Khk</i> KO mouse                           | Cyagen Biosciences                                      | N/A                                                                 | Primary microglia                                           |
| <b>Software and algorithms</b>                |                                                         |                                                                     |                                                             |
| IMARIS software                               | Bitplane                                                | <a href="https://imaris.oxinst.com/">https://imaris.oxinst.com/</a> | Reconstruction and analysis of Immunofluorescence and golgi |

|                        |                   |                                                                                               |                                                                                                                |
|------------------------|-------------------|-----------------------------------------------------------------------------------------------|----------------------------------------------------------------------------------------------------------------|
|                        |                   |                                                                                               | Staining image                                                                                                 |
| GraphPad Prism 7       | GraphPad          | N/A                                                                                           | statistics                                                                                                     |
| Bioinformatic analysis | Lc-bio            | <a href="https://www.omicstudio.cn/tool">https://www.omicstudio.cn/tool</a>                   | Enrichment analysis;<br>Correlation analysis; Volcano plot; GSEA analysis;<br>Differential expression analysis |
| Comprehensive analysis | N/A               | <a href="https://www.metaboanalyst.ca/home.xhtml">https://www.metaboanalyst.ca/home.xhtml</a> | Comprehensive analysis of transcriptomics and metabolomics                                                     |
| ImageJ                 | NIH               | <a href="https://imagej.nih.gov/ij/">https://imagej.nih.gov/ij/</a>                           | Synaptic analysis                                                                                              |
| Mini Analysis          | Synaptosoft       | <a href="http://www.synaptosoft.com">www.synaptosoft.com</a>                                  | Electrophysiology analysis                                                                                     |
| Clampfit               | Molecular Devices | N/A                                                                                           | Electrophysiology analysis                                                                                     |

293

294

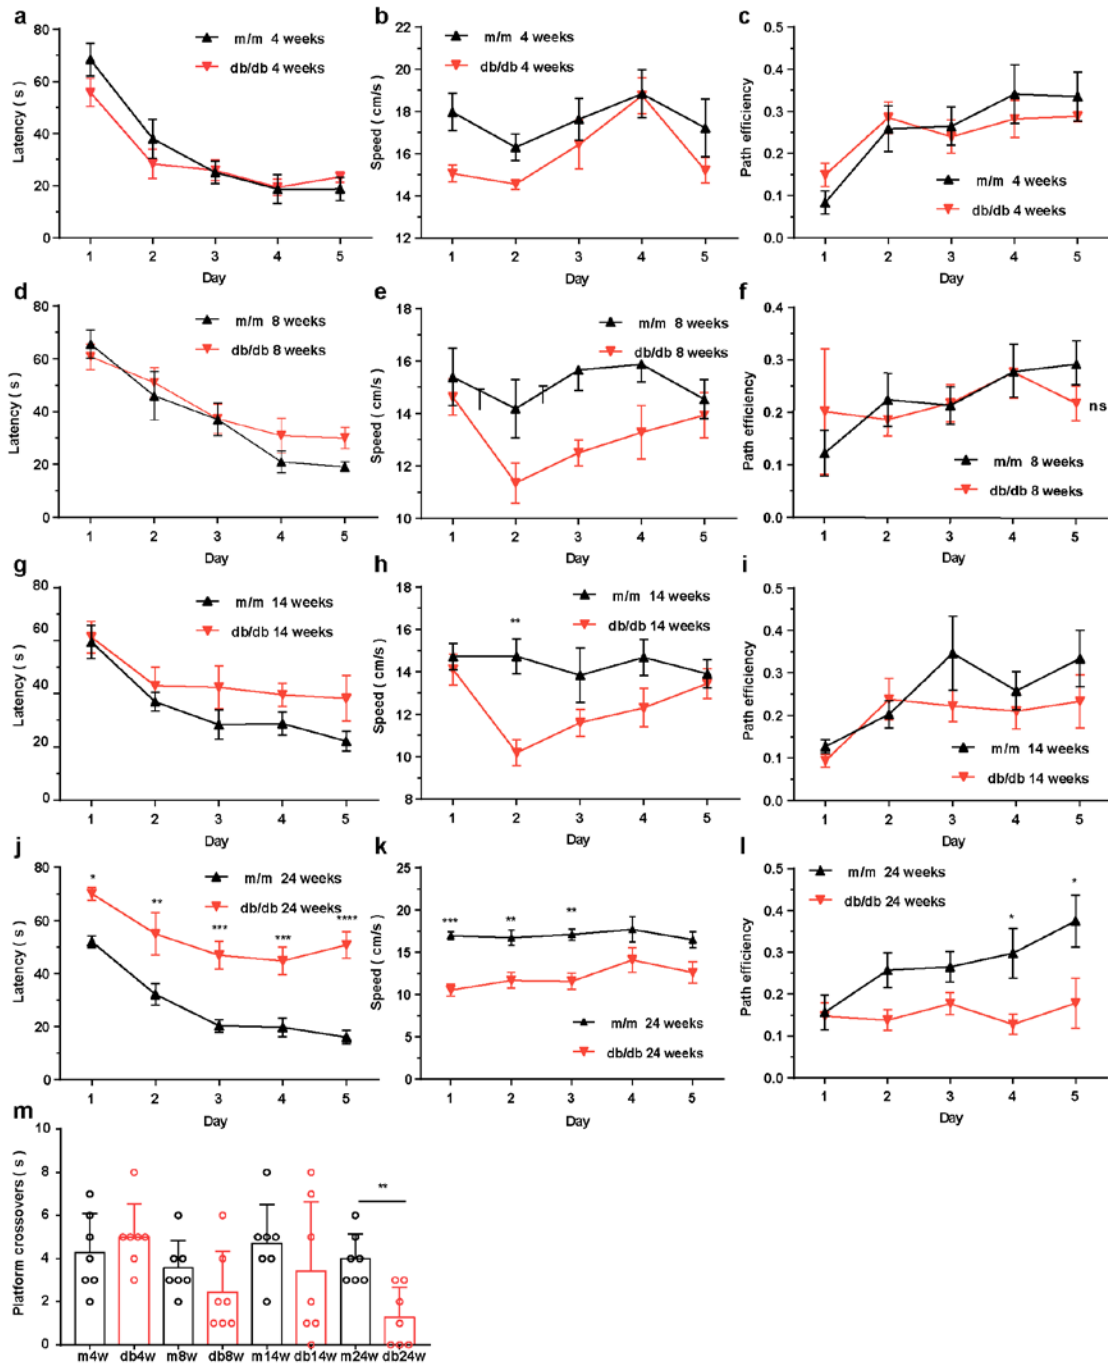

296

297 **Supplementary Fig. 1. Periodic measurements of cognitive status of db/db and**

298 **m/m mice.**

299 (a-c) The escape latency (a), swimming speed (b) and path efficiency (c) of 4-week

300 db/db and m/m mice during the training session of MWM test. (d-f) The escape

301 latency (d), swimming speed (e) and path efficiency (f) of 8-week db/db and m/m

302 mice during the training session. (g-i) The escape latency (g), swimming speed (h)  
303 and path efficiency (i) of 14-week db/db and m/m mice during the training session.  
304 (j-l) The escape latency (j), swimming speed (k) and path efficiency (l) of 24-week  
305 db/db and m/m mice during the training session. (m) The number of platform  
306 crossovers in the probe trial of MWM in db/db and littermate m/m mice at the 4, 8, 14  
307 and 24 weeks. All data were presented as the mean  $\pm$  SEM. The results in (a-l) were  
308 analyzed by two-way ANOVA. The results in (m) were analyzed by one-way  
309 ANOVA with Tukey's multiple comparisons test.  $n = 7$  mice per group.  $*P < 0.05$ ;  
310  $**P < 0.01$ ;  $***P < 0.001$ ;  $****P < 0.0001$ .

311

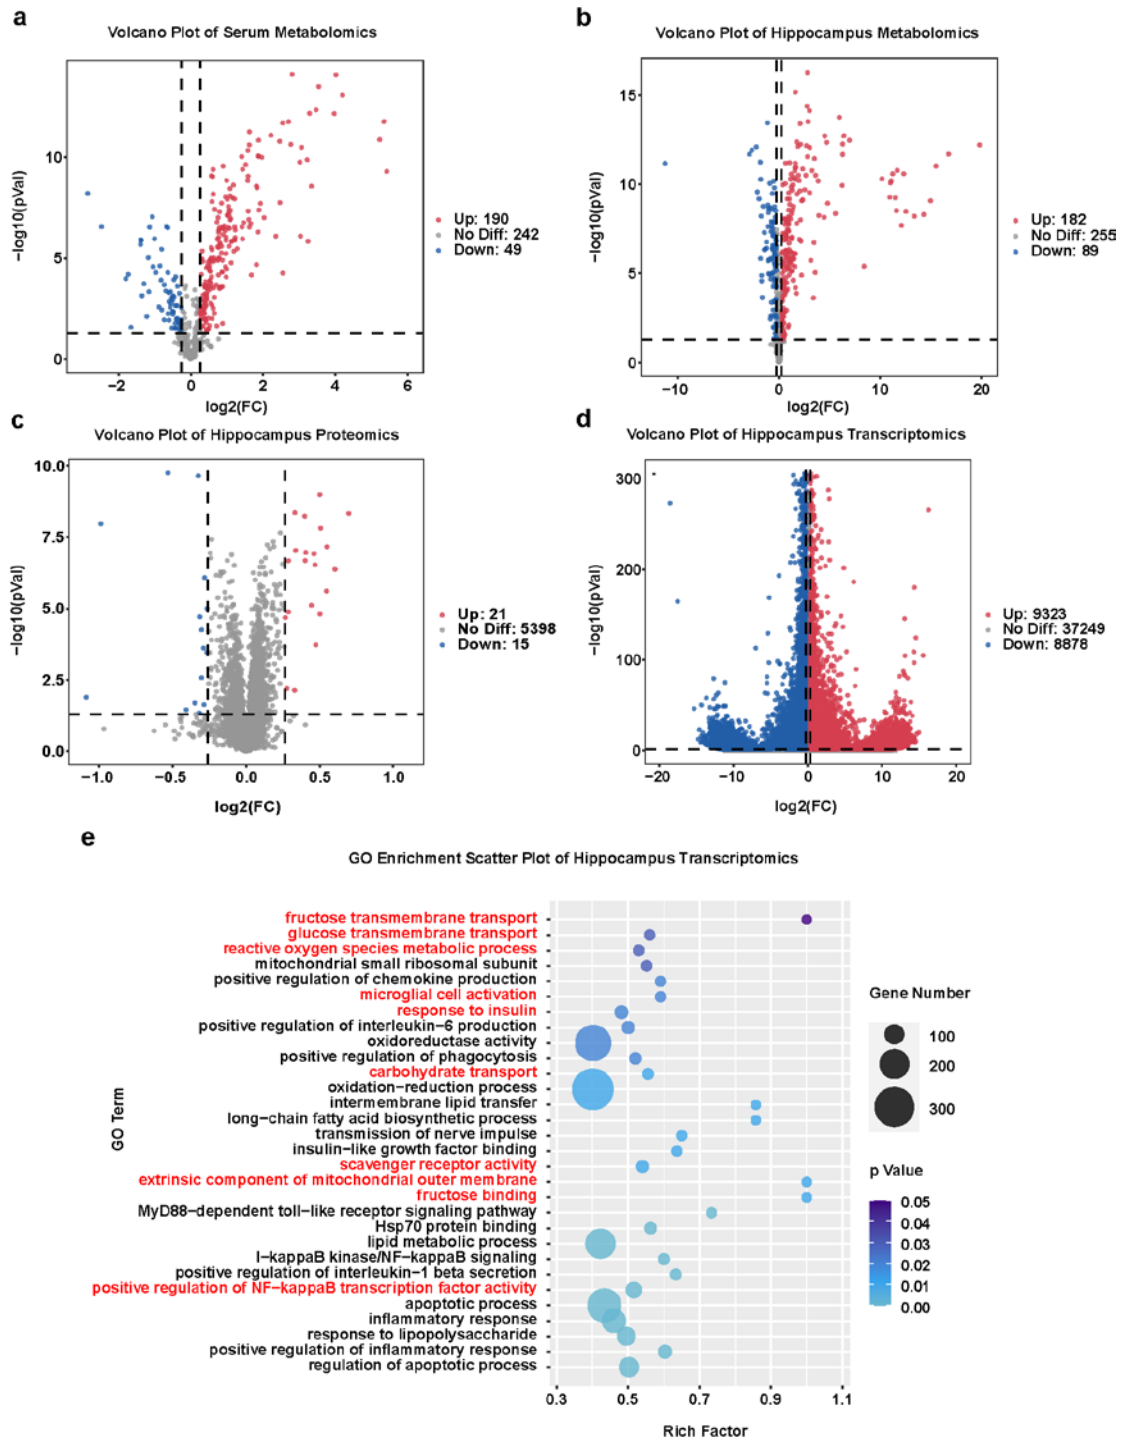

312

313 **Supplementary Fig. 2. Multi-omics of serum and/or hippocampus of db/db and**

314 **m/m mice.**

315 (a, b) Volcano plot of widely targeted metabolomics for the serum (a) and

316 hippocampus (b) exhibited the differential metabolites in the db/db vs. m/m mice (n =

317 6). (c, d) Volcano plot of proteomic and transcriptomic sequencing of the

318 hippocampus showing the differential proteins (c) and genes (d) between db/db and  
319 m/m mice (n = 5). The data in (a-d) are described by red dot (up-regulated) and blue  
320 dot (down-regulated). (e) The GO enrichment analysis of hippocampus  
321 transcriptomics.  
322

### Expression of Genes in Fructose and Mannose Metabolism

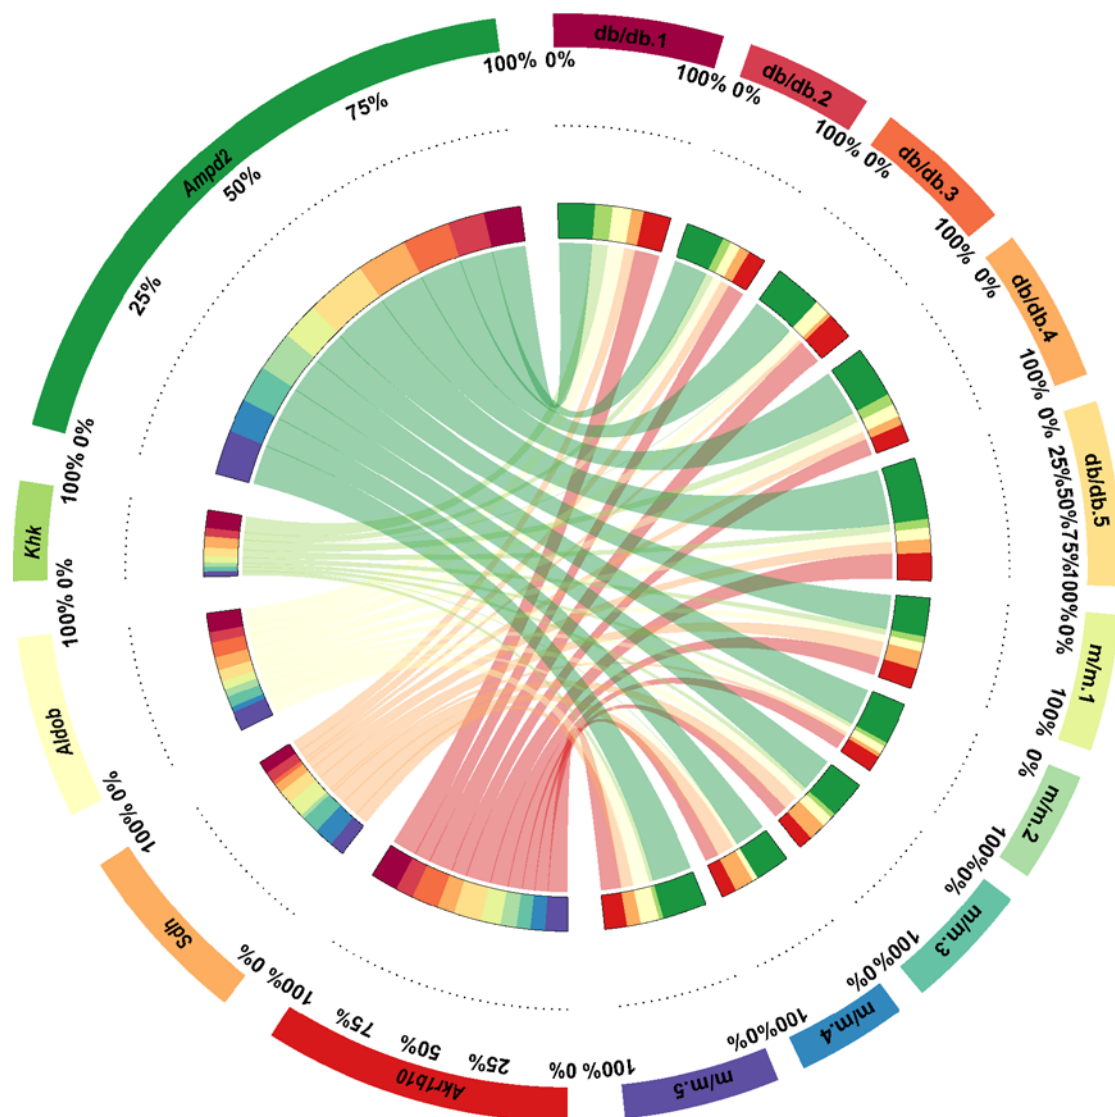

323

324 **Supplementary Fig. 3. Expression pattern of DEGs involved in “fructose and**  
325 **mannose metabolism” pathway in RNA-seq analysis.**

326 The left semicircle represents key genes of the “fructose and mannose metabolism”  
327 pathway in DEGs, and the length of the arc indicates the abundance; the right  
328 semicircle represents 5 separate biological replicates for each group.

329



Relevant metabolic and transcriptional differences in the pathway of “fructose and mannose metabolism”

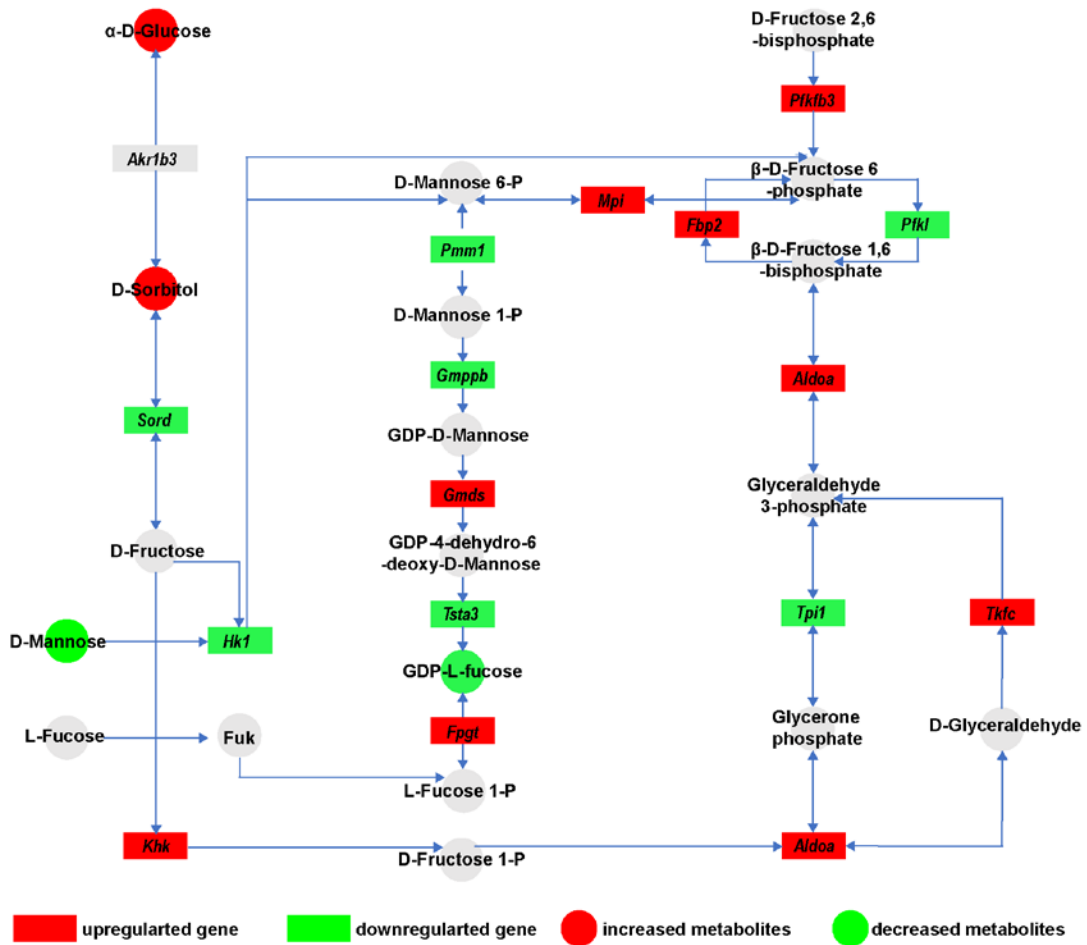

330

331 **Supplementary Fig. 4. Relevant differences in the pathway of “fructose and**  
 332 **mannose metabolism”.**

333 Schematic representation of relevant metabolic and transcriptional differences in the  
 334 pathway of “fructose and mannose metabolism” by comprehensive analysis ( $P = 3.53$   
 335  $e-06$ ). The circles present metabolites, and the rectangles present genes. The red one  
 336 indicates a significant increase in metabolite concentrations or gene expression levels,  
 337 while the green one indicates significantly declined concentrations of metabolites or  
 338 expression levels of genes.

339

340

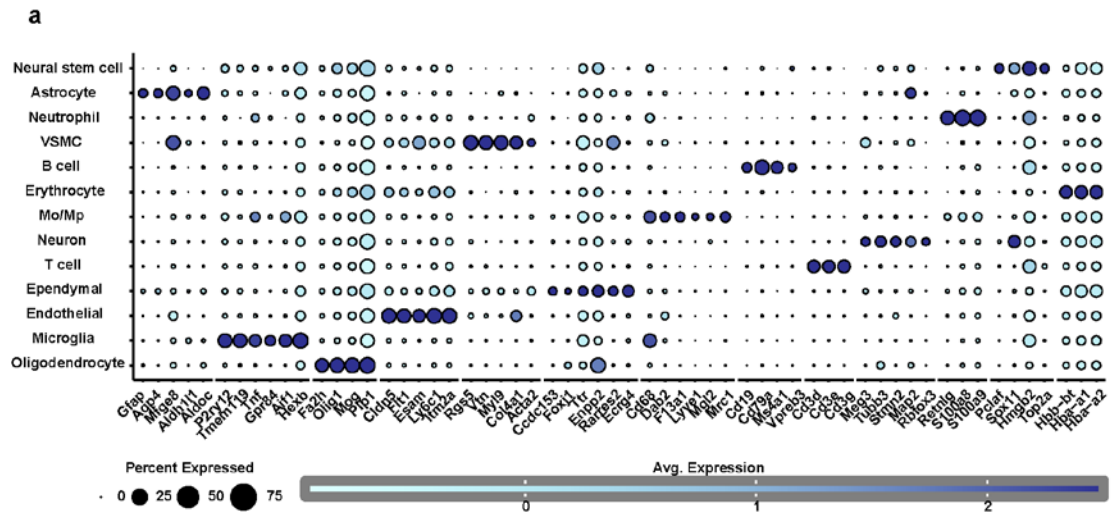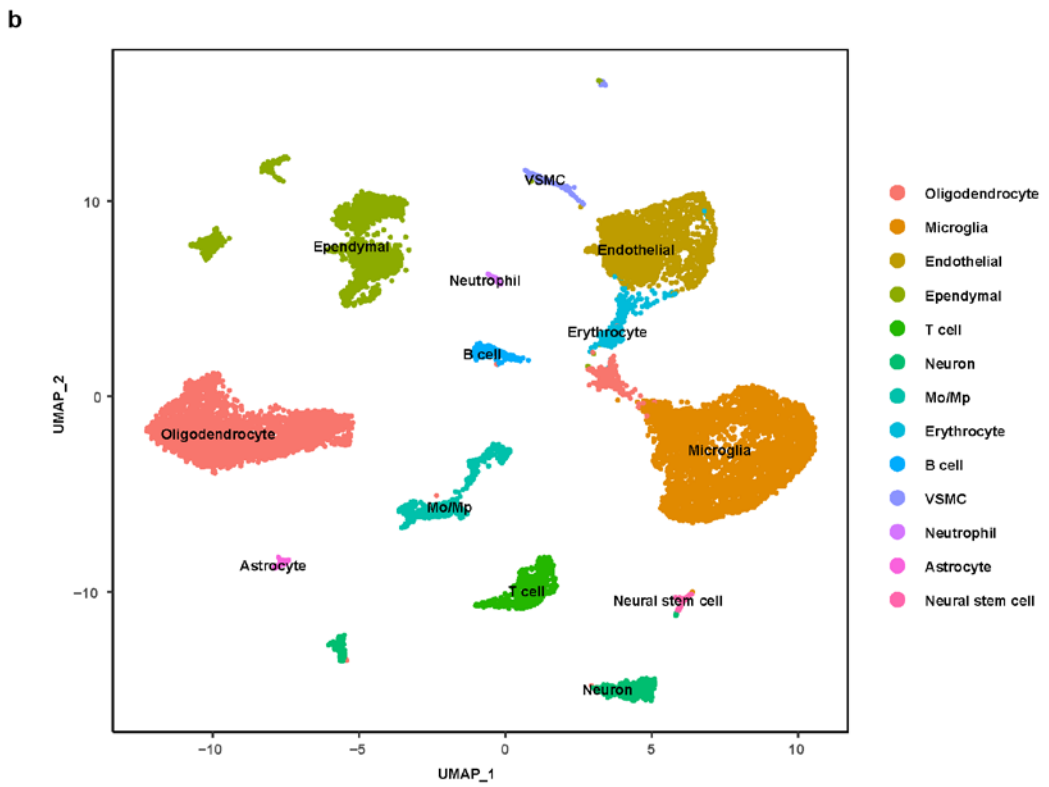

341  
 342 **Supplementary Fig. 5. Cell annotation of scRNA-seq dataset GSE201644.**  
 343 (a) Dot plot showing the specific genes for different cells. (b) Uniform Manifold  
 344 Approximation and Projection (UMAP) plot of cells isolated from db/db and db/m  
 345 hippocampus exhibiting 13 distinct cell types.  
 346

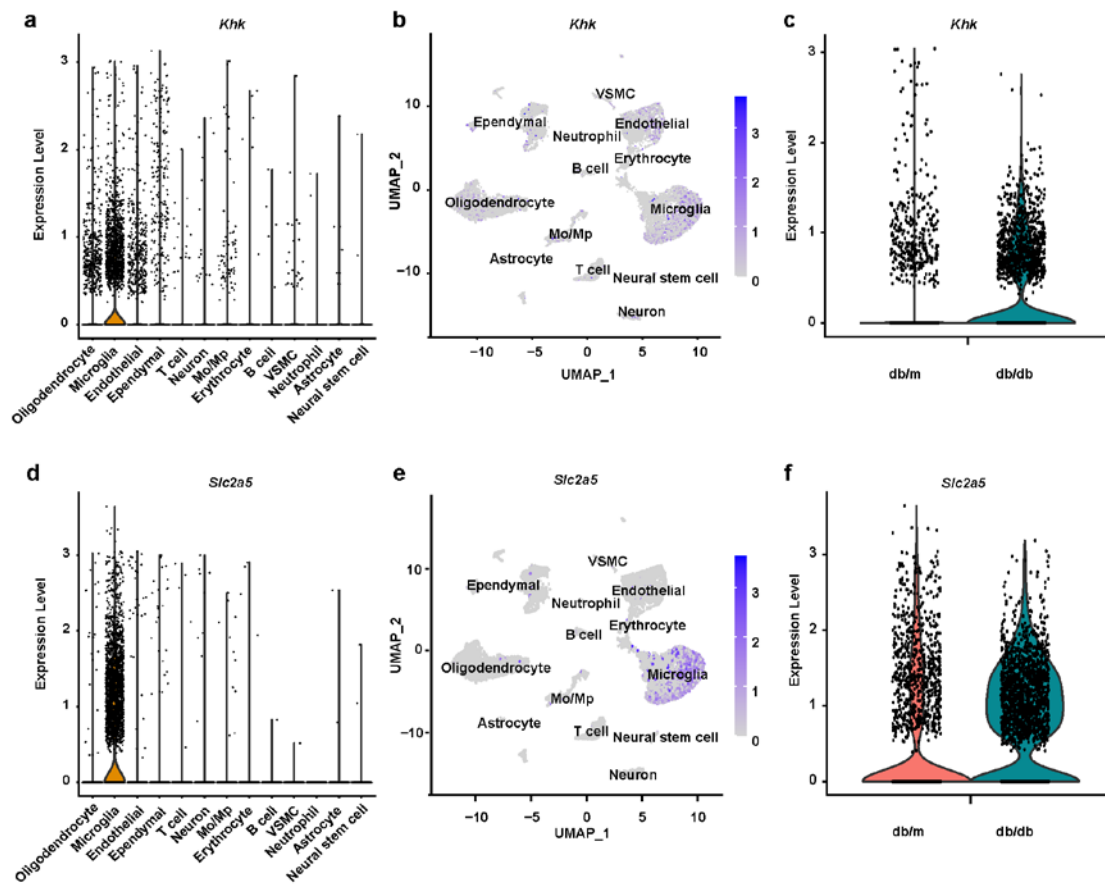

347

348 **Supplementary Fig. 6. The expression of *Khk* and *Slc2a5* in microglia in dataset**  
 349 **GSE201644.**

350 (a) Violin plot of *Khk* expression in the annotated cells. (b) Uniform Manifold  
 351 Approximation and Projection (UMAP) plot showed the expression of *Khk* in  
 352 different cells. (c) Violin plot of *Khk* expression in the microglia of db/db and db/m.

353 (d) Violin plot of *Slc2a5* expression in the annotated cells. (e) Uniform Manifold  
 354 Approximation and Projection (UMAP) plot showed the expression of *Slc2a5* in  
 355 different cells. (f) Violin plot of *Slc2a5* expression in the microglia of db/db and

356 db/m.

357

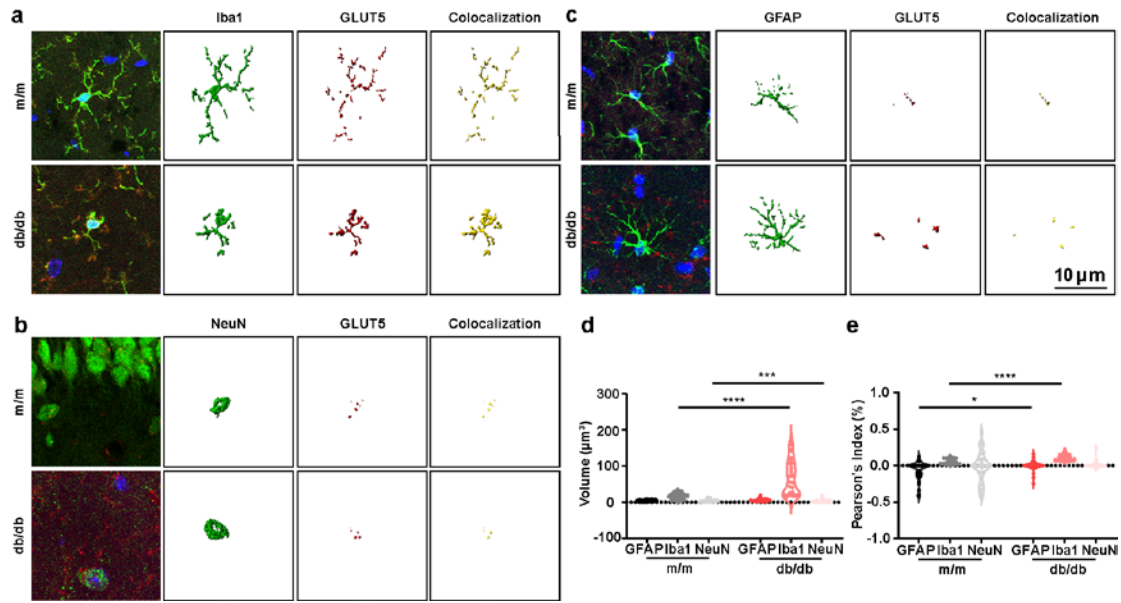

358

359 **Supplementary Fig. 7. Expression and localization of GLUT5 in the**  
 360 **hippocampus of db/db mice.**

361 (a-c) Representative confocal images and three-dimensional reconstruction of GLUT5  
 362 (red) colocalization status in microglia (a, green), neuron (b, green) or astrocytes (c,  
 363 green). DNA was labeled by DAPI (blue). Scale bar = 10  $\mu\text{m}$ . (d) Volume of GLUT5  
 364 and cell markers colocalization intensity (n = 30 from 4-5 mice). (e) Correlation of  
 365 GLUT5 and cell markers fluorescence intensity (n = 30 from 4-5 mice). All data were  
 366 presented as the mean  $\pm$  SEM and were analyzed by student's t test or Mann-Whitney  
 367 test based on the results of normal distribution test. \* $P < 0.05$ ; \*\* $P < 0.01$ ; \*\*\* $P <$   
 368 0.001; \*\*\*\* $P < 0.0001$ .

369

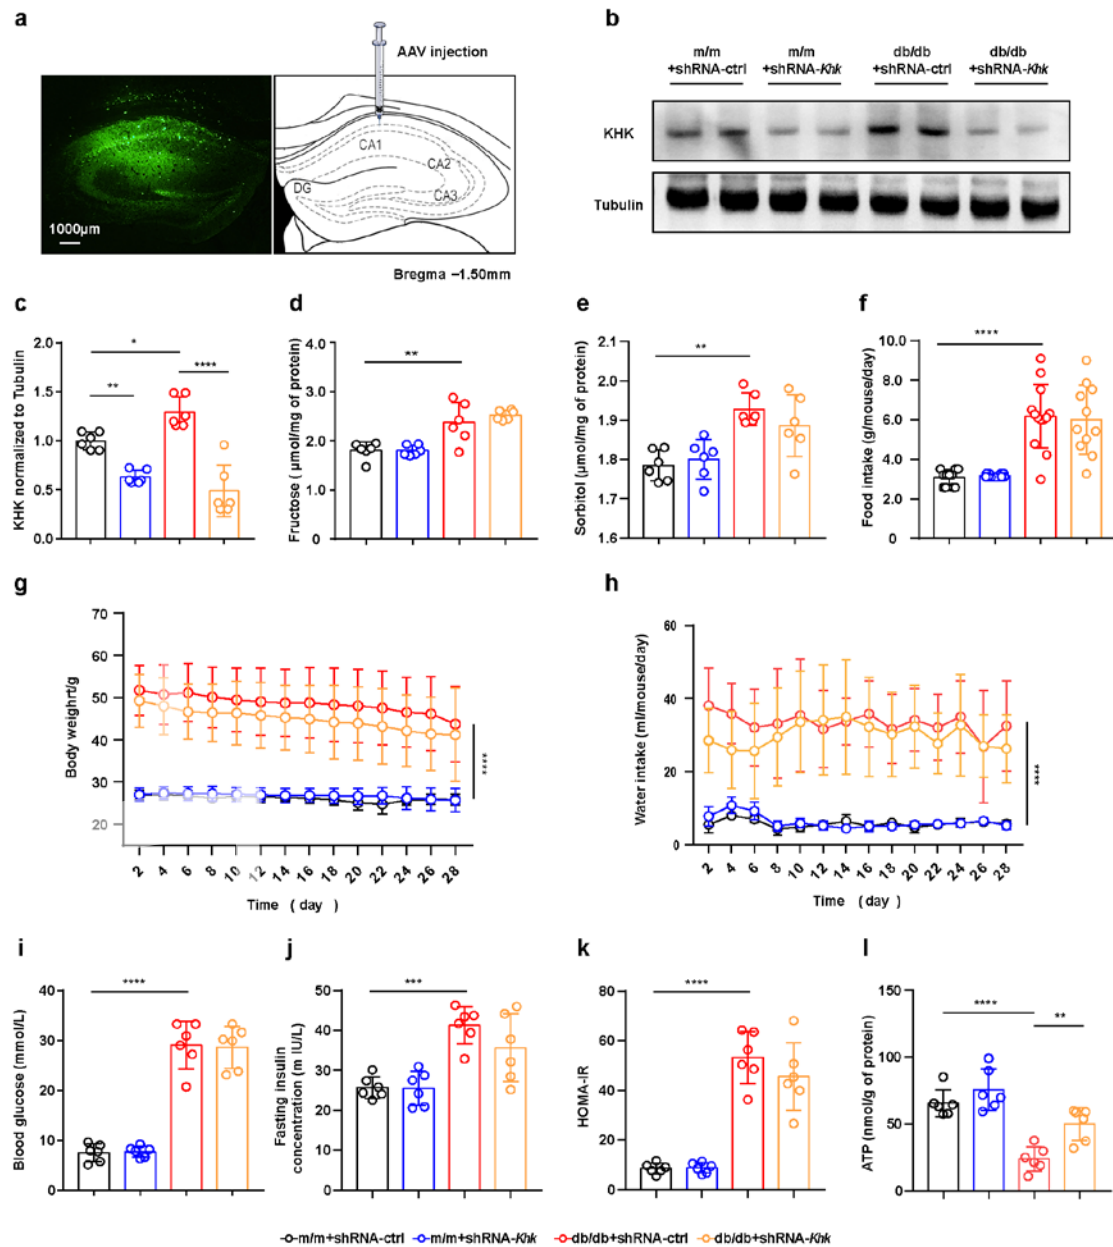

370

371

**Supplementary Fig. 8. *Khk* knockdown increases ATP level in the hippocampus**

372

**of db/db mice.**

373

(a) Expression of AAV-encoded EGFP carrying *Khk*-shRNA-EGFP 3 weeks after

374

ICV injection. (b, c) Representative western blot (b) and densitometric analysis (c) of

375

KHK (n = 6). (d-k) The effect of *Khk* knockdown on fructose (d) and sorbitol levels

376

(e), or physical parameters such as food intake (f), body weight (g), water intake (h),

377

blood glucose (i), fasting insulin concentration (j), or HOMA-IR (k) (n = 6-12). (l)

378

*Khk* knockdown increases ATP level in the hippocampus of db/db mice (n = 6). The

379 data were presented as mean  $\pm$  SEM. The data in (c-f, i-l) were analyzed by one-way  
380 ANOVA with Tukey post hoc analysis. The data in (g, h) were analyzed by two-way  
381 ANOVA. \* $P < 0.05$ ; \*\* $P < 0.01$ ; \*\*\* $P < 0.001$ ; \*\*\*\* $P < 0.0001$ .

382

383

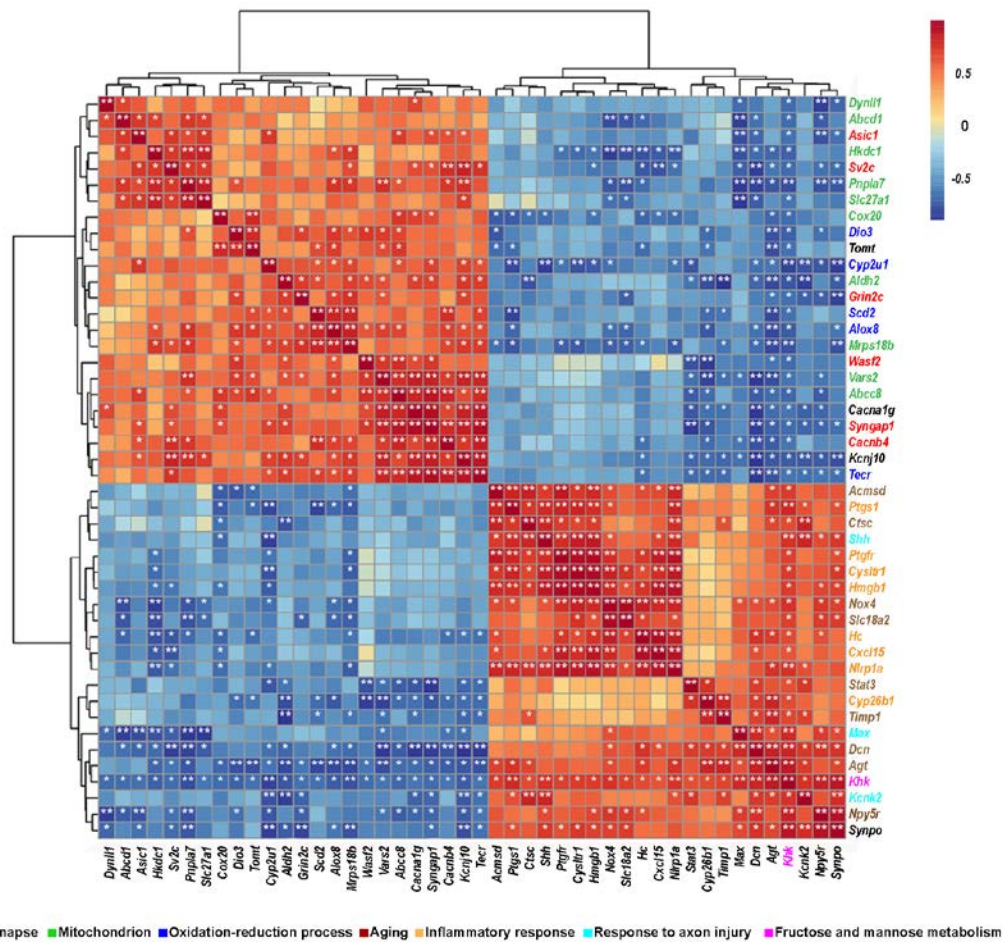

384

385 **Supplementary Fig. 9. Heat map of representative DEGs correlated with *Khk*.**

386 In RNA-seq analysis, 287 DEGs were correlated with *Khk*, 24 of which were  
 387 negatively correlated and enriched in the GO terms such as “synapse”,  
 388 “mitochondrion”, “oxidation-reduction process”, and the other 21 DEGs were  
 389 positively correlated and enriched in “aging”, “inflammatory response” and “response  
 390 to axon injury”.

391



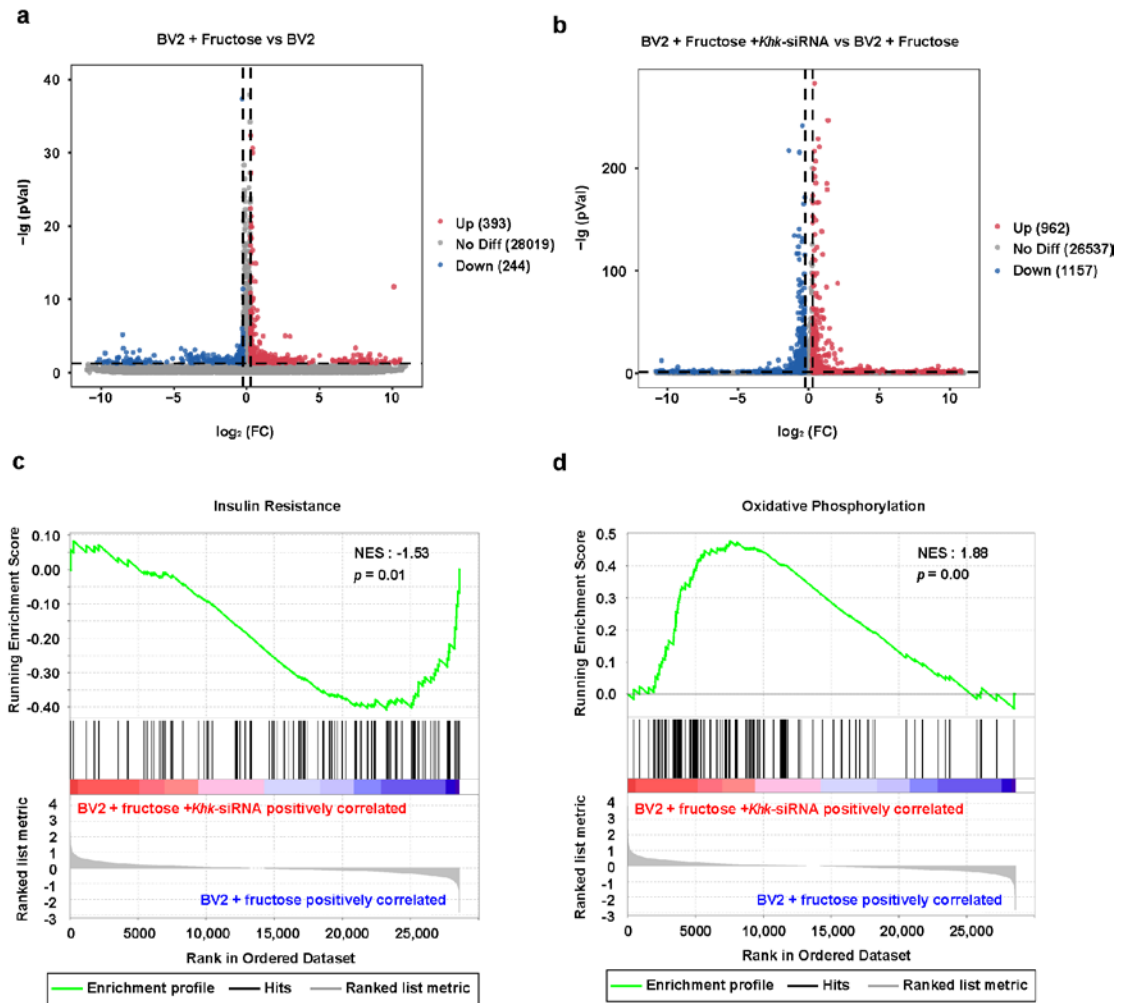

392

393 **Supplementary Fig. 10. Alternations in gene expression of BV2 cells after**  
 394 **fructose treatment or *Khk* depletion.**

395 (a, b) Volcano plot showing upregulation (red) or downregulation (blue) in gene  
 396 expression of BV2 cells in indicated conditions. (n = 6) (c, d) The alternation of  
 397 “insulin resistance” pathway (c) and “oxidative phosphorylation” pathway (d) in  
 398 different conditions via GSEA.

399

400



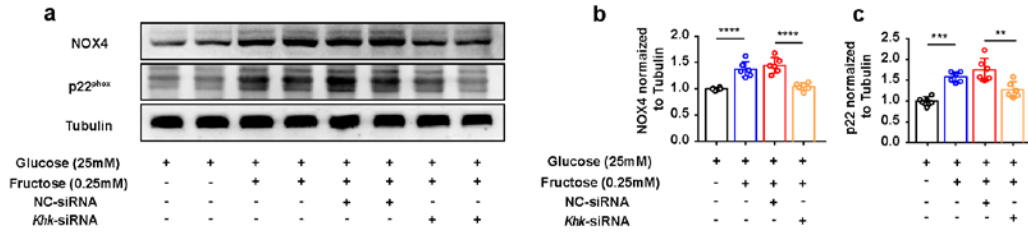

401

402 **Supplementary Fig. 11. The expression of NOX4 and p22<sup>phox</sup> in BV2 cells after**  
 403 **the treatment of fructose or knocking down *Khk*.**

404 (a) Representative western blot of NOX4 and p22<sup>phox</sup> in BV2 cell under different  
 405 conditions. (b,c) Densitometric analysis of NOX4 (b) and p22<sup>phox</sup> (c) in BV2 cell  
 406 under different conditions (n = 6).

407

408

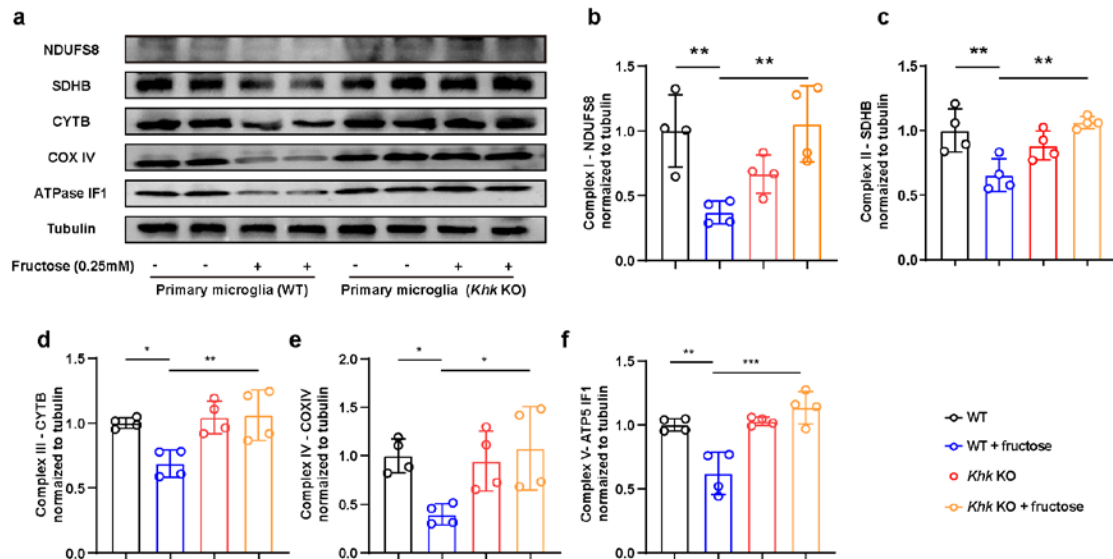

409

410 **Supplementary Fig. 12. The expression of OXPHOS related proteins in WT and**

411 ***Khk* KO primary microglia after the treatment of fructose.**

412 (a) Representative western blot of OXPHOS related proteins, including NDUFS8

413 (complex I), SDHB (complex II), CYTB (complex III), COX IV (complex IV) and

414 ATPase IF1 (complex V) in wild type (WT) or *Khk* KO mice primary microglia with

415 or without fructose treatment. (b-f) Densitometric analysis of OXPHOS related

416 proteins in wild type (WT) or *Khk* ko primary microglia with or without fructose

417 treatment (n = 4).

418

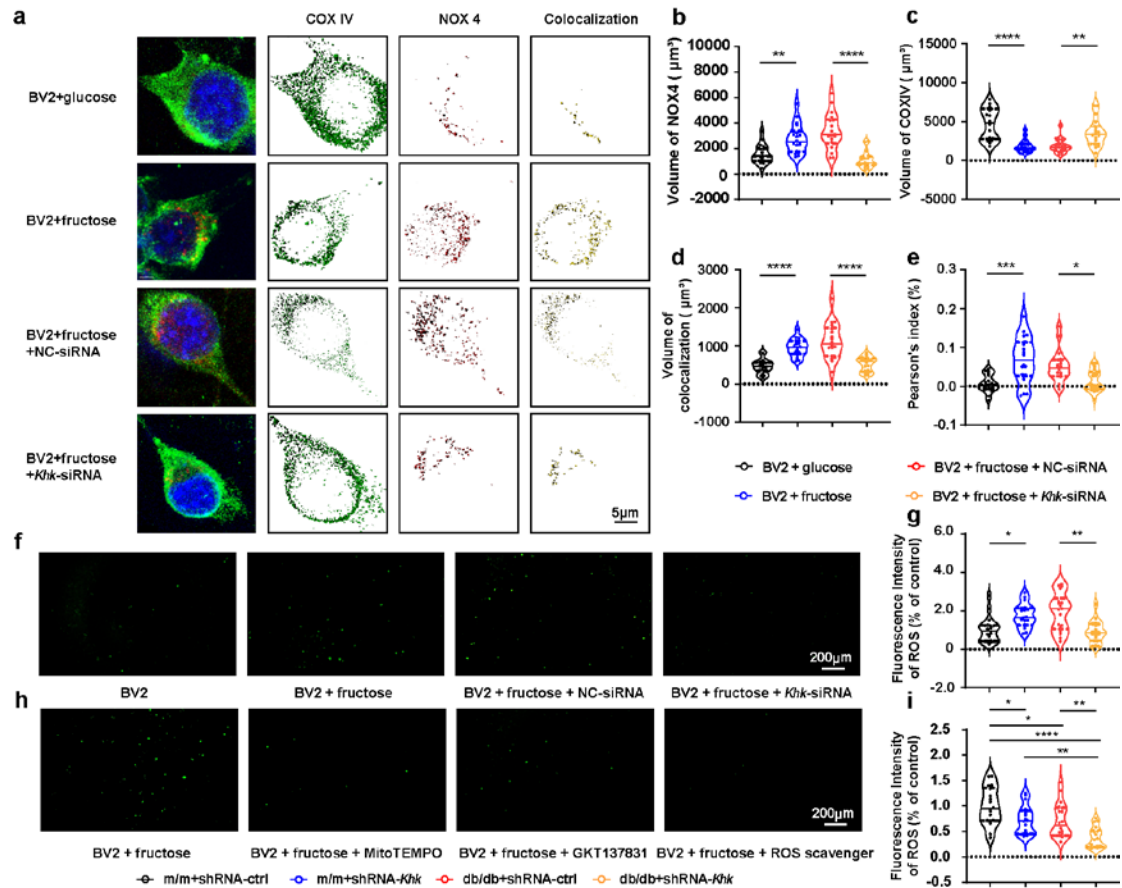

419

420 **Supplementary Fig. 13. The alternations of NOX4 mitochondrial translocation**  
 421 **and ROS production in BV2 cell treated with or without fructose or *Khk*-siRNA**

422 (a) Representative immunofluorescence image and three-dimensional reconstruction  
 423 of the mitochondrial marker NOX4 (red) and COX IV (green) in BV2 cell lines at the  
 424 absence or presence of fructose or *Khk*-siRNA. DNA was labeled by DAPI (blue).  
 425 Bar = 5 μm. (b-d) Fluorescence intensity of NOX4 (b), COX IV (c) and their  
 426 colocalization (d) (n = 18 cells from 3 independent experiments). (e) Correlation of  
 427 NOX4 and COX IV fluorescence intensity (n = 18 cells from 3 independent  
 428 experiments). (f, g) Representative fluorescence images (f) and quantification analysis  
 429 (g) of ROS fluorescence intensity in BV2 cells treated with or without fructose and  
 430 *Khk*-siRNA (n = 18 from 3 independent experiments). Scale bar = 200 μm. (h, i)

431 Representative fluorescence images (h) and quantification analysis (i) of ROS  
432 fluorescence intensity of BV2 cells treated with or without NOX4 inhibitor  
433 (GKT137831), mitochondrial ROS inhibitor (Mito-Tempo) or ROS scavenger  
434 (N-acetylcysteine) in fructose-loaded medium (n = 18 from 3 independent  
435 experiments). Scale bar = 200  $\mu$ m. The data were presented as mean  $\pm$  SEM and were  
436 analyzed by one-way ANOVA with Tukey post hoc analysis (b, c, e, i) or  
437 Kruskal-Wallis followed by Dunn's multiple comparisons tests (d, g). \* $P$  < 0.05; \*\* $P$   
438 < 0.01; \*\*\* $P$  < 0.001; \*\*\*\* $P$  < 0.0001.

439

440

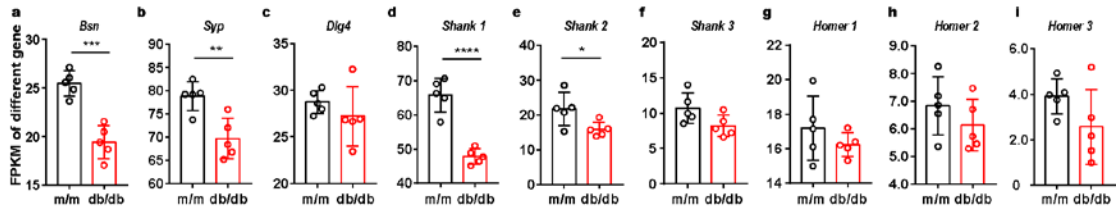

441

442 **Supplementary Fig. 14. The alternations in abundance of synaptic proteins from**  
 443 **RNA-seq of hippocampus.**

444 The alternations in Bsn (a), Syp (b), Dlg4 (c), Shank1 (d), Shank2 (e), Shank3 (f),  
 445 Homer1 (g), Homer2 (h) and Homer3 (i) from RNA-seq of hippocampus between  
 446 db/db mice vs m/m mice (n = 5). The data were presented as mean ± SEM and were  
 447 analyzed by Student's t test. \* $P < 0.05$ ; \*\* $P < 0.01$ ; \*\*\* $P < 0.001$ ; \*\*\*\* $P < 0.0001$ .

448

449

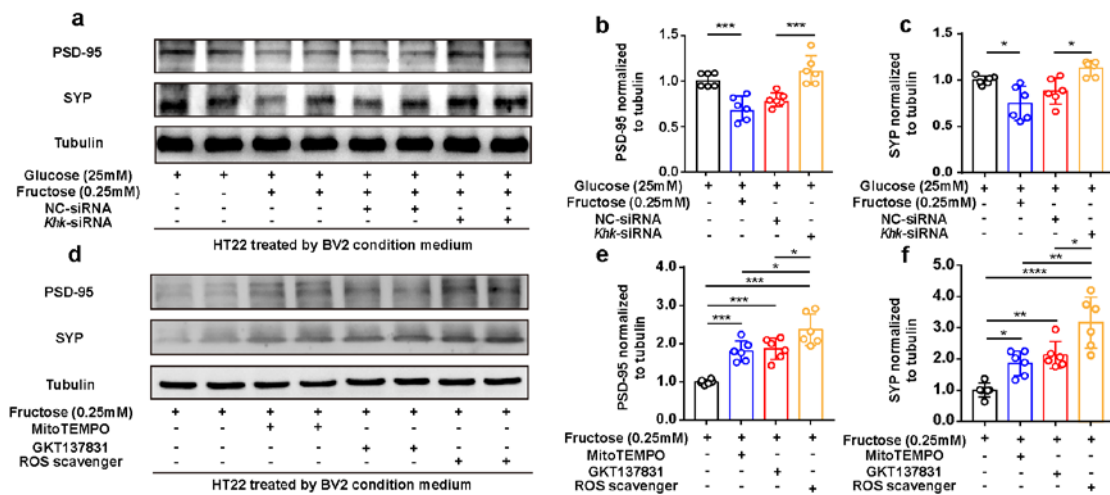

450

451 **Supplementary Fig. 15. The expression of PSD-95 and SYP in HT22 cells after**  
 452 **the treatment of BV2 condition medium.**

453 (a-c) BV2 cells were treated with or without fructose, NC-siRNA or *Khk*-siRNA, then  
 454 the BV2-conditioned medium was collected for HT22 cell culture. Representative  
 455 western blot (a) and densitometric analysis of PSD-95 (b) and SYP (c) in HT22 cells  
 456 (n = 6). (d-f) BV2 cells were treated with or without MitoTEMPO, GKT137831 and  
 457 ROS scavenger in fructose-loaded medium and the BV2-conditioned medium were  
 458 collected for HT22 cell culture. Representative western blot (d) and densitometric  
 459 analysis of PSD-95 (e) and SYP (f) expression in HT22 cells (n = 6). The data were  
 460 presented as mean ± SEM and were analyzed by one-way ANOVA with Tukey post  
 461 hoc analysis (b, c, e, f). \**P* < 0.05; \*\**P* < 0.01; \*\*\**P* < 0.001; \*\*\*\**P* < 0.0001.

462

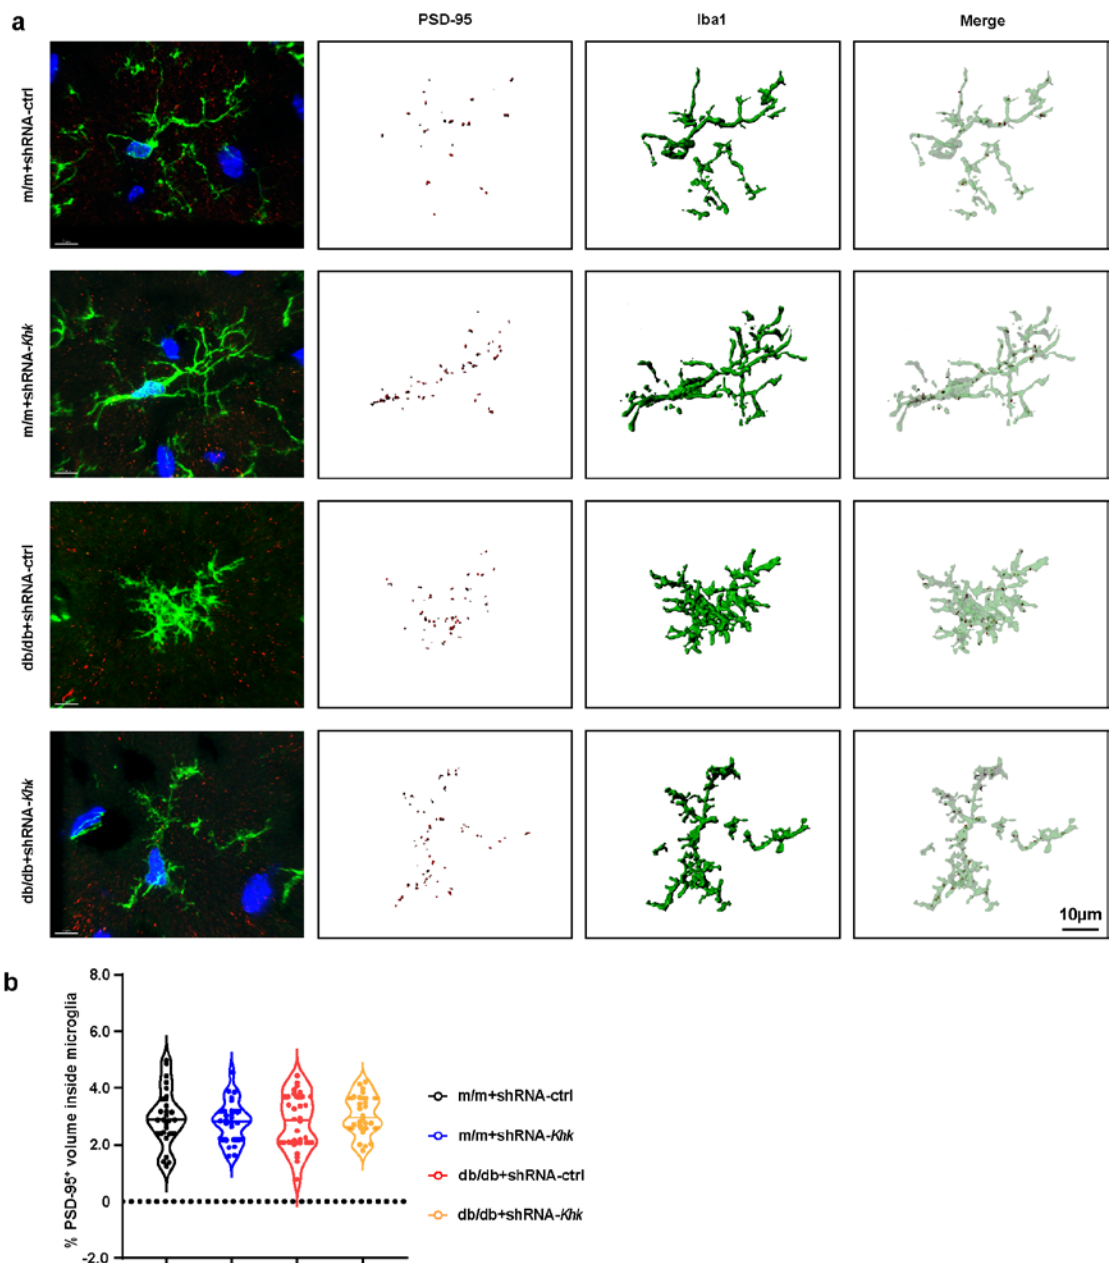

## Reference

- 473 1. Ma, H. et al. Transplantation of platelet-derived mitochondria alleviates cognitive impairment and  
474 mitochondrial dysfunction in db/db mice. *Clin Sci (Lond)*. **134**, 2161-2175 (2020).
- 475 2. Kechin, A., Boyarskikh, U., Kel, A. & Filipenko, M. cutPrimers: A New Tool for Accurate Cutting  
476 of Primers from Reads of Targeted Next Generation Sequencing. *J Comput Biol*. **24**, 1138-1143 (2017).
- 477 3. Beekman, R. et al. The reference epigenome and regulatory chromatin landscape of chronic  
478 lymphocytic leukemia. *Nat Med*. **24**, 868-880 (2018).
- 479 4. Kim, D., Langmead, B. & Salzberg, S. L. HISAT: a fast spliced aligner with low memory  
480 requirements. *Nat Methods*. **12**, 357-360 (2015).
- 481 5. Pertea, M. et al. StringTie enables improved reconstruction of a transcriptome from RNA-seq  
482 reads. *Nat Biotechnol*. **33**, 290-295 (2015).
- 483 6. Trapnell, C. et al. Transcript assembly and quantification by RNA-Seq reveals unannotated  
484 transcripts and isoform switching during cell differentiation. *Nat Biotechnol*. **28**, 511-515 (2010).
- 485 7. Pang, Z. et al. MetaboAnalyst 5.0: narrowing the gap between raw spectra and functional insights.  
486 *Nucleic Acids Res*. **49**, W388-W396 (2021).
- 487 8. Mao, K. et al. An Integrative Transcriptomic and Metabolomic Study Revealed That Melatonin  
488 Plays a Protective Role in Chronic Lung Inflammation by Reducing Necroptosis. *Front Immunol*. **12**,  
489 668002 (2021).
- 490 9. Ma, S. et al. Single-Cell Sequencing Analysis of the db/db Mouse Hippocampus Reveals  
491 Cell-Type-Specific Insights Into the Pathobiology of Diabetes-Associated Cognitive Dysfunction.  
492 *Front Endocrinol (Lausanne)*. **13**, 891039 (2022).
- 493 10. Stuart, T. et al. Comprehensive Integration of Single-Cell Data. *Cell*. **177**, 1888-1902 (2019).
- 494 11. Korsunsky, I. et al. Fast, sensitive and accurate integration of single-cell data with Harmony. *Nat*  
495 *Methods*. **16**, 1289-1296 (2019).
- 496 12. Li, Z.-Z. et al. Extracellular matrix protein laminin  $\beta$ 1 regulates pain sensitivity and  
497 anxiodepression-like behaviors in mice. *J Clin Invest*. **131**, e146323 (2021).
- 498 13. Yang, J. et al. RIPK3/MLKL-Mediated Neuronal Necroptosis Modulates the M1/M2 Polarization  
499 of Microglia/Macrophages in the Ischemic Cortex. *Cereb Cortex*. **28**, 2622-2635 (2018).
- 500 14. Tang, W. et al. Caveolin-1 Alleviates Diabetes-Associated Cognitive Dysfunction Through  
501 Modulating Neuronal Ferroptosis-Mediated Mitochondrial Homeostasis. *Antioxid Redox Signal*. **37**,  
502 867-886 (2022).
- 503
